# Supplementary material
Source: HighWire-hosted journal article supplement (http://jnis.bmj.com/highwire/filestream/143224/field_highwire_adjunct_files/0/neurintsurg-2015-011835supp_table1.xls)
Supplement: neurintsurg-2015-011835supp_table1.xls [file neurintsurg-2015-011835supp_table1.xls]

## Sheet: Blad1
Supplementary table 1. RCT quality details
Study namne	Randomization	Blinding	Analysis	Sponsors	Sponsor study details
ESCAPE	1:1. Real-time, dynamic, Internet-based, randomized minimization procedure	Open label, blinded outcome evaluation	ITT	University of Calgary, Covidien, Heart and Stroke foundation, Alberta Innovates Health Solutions	Independent data and safety monitoring borad. The study funders were not involved in the design or conduct of the study
EXTEND 1A	1:1. Centralized website	Open label, blinded-end study	ITT and target group analysis	Australian National Health, Medical Research Council of Australia, Royal Australian College of Physicians, Royal Melbourne Hospital Foundation, National Heart Foundation of Australia, National Stroke Foundation of Australia, infra- structure funding from the state government of Victoria. Solitaire FR device and trial infrastructure from Covidien	Covidiend was not involved in the study design or conduct or in the preparation of the manuscript, except to review the protocol to ensure that the specified use of devices in the study followed the approved instructions for use
IMS-III	2:1. Sealed envelope with a subject identification number	Open label, blinded outcome evaluation	ITT	Genentech, EKOS, Concentric Medical, Cordis Neurovascular, Boehringer Ingelheim	None of the industry sponsors were involved in the study design, study conduct, manuscript review or protocol review, except to make sure that the specified use of devices in the study followed the instructions for use approved by the Food and Drug Administration
MR CLEAN	1:1. Computer and web-based using permuted blocks	Open label, blinded endpoint evaluation	ITT	Dutch Heart Foundation, AngioCare BV, EV3A, Covidien, Lamepro, Penumbra, Top Medical Concentric	Study sponsors were not involved in the study design, study conduct, protocol review, or manuscript preparation or review
SWIFT PRIME	1:1. Central website for randomization, minimization algorithm	Open clinical trial, blinded outcome evaluation	ITT	Covidien	The trial was funded by Covidien and designed and led by a steering committee that included academic investigators and representatives of the sponsor
REVASCAT	1:1. Central website, real-time computerized randomization procedure, minimization process algorithm	Open-label, blinded outcome evaluation	ITT	Covidien, Spanish ministry of health, Fondo Europeo de Desarrollo Regional, Generalitat de Catalunya	Covodiene was not involved in the design or conduct of the study, or in the writing of the protocol or in the manuscript
ITT = intention to treat
